# Supplementary material for: Insights into the Properties and Potential Applications of Renewable Carbohydrate-Based Ionic Liquids: A Review
Source: PubMed Central journal article supplement (PMC7397332; doi:10.3390/molecules25143285), 2020-07-20
Supplement: molecules-25-03285-s001.pdf [file molecules-25-03285-s001.pdf]

## Supporting Information

# Insights into the Properties and Potential Applications of Renewable Carbohydrate-Based Ionic Liquids—A Review

Bartłomiej Gaida <sup>1</sup> and Alina Brzeczek-Szafran <sup>1,\*</sup>

<sup>1</sup> Department of Chemical Organic Technology and Petrochemistry, Silesian University of Technology, Krzywoustego 4, 44100 Gliwice, Poland

\* Correspondence: [alina.brzeczek-szafran@polsl.pl](mailto:alina.brzeczek-szafran@polsl.pl)

**Table S1.** Thermal properties of carbohydrate ILs and salts. n.a. – not available, a – measured at 20 °C, b – measured in 70 °C, c – decomposition of 50% of the sample.

| No. | Acronym                                                                          | $T_g$ [°C] | $T_m$ [°C] | $T_d$ [°C]         | $\eta$ [mPa s]       | Ref. |
|-----|----------------------------------------------------------------------------------|------------|------------|--------------------|----------------------|------|
| 1a  | [EMIM][Glucuronate]                                                              | n.a.       | Liquid     | <200               | n.a.                 | [1]  |
| 1b  | [N <sub>4444</sub> ][Glucuronate]                                                | -20.5      | 80-100     | 136                | n.a.                 | [2]  |
| 1c  | [N <sub>4444</sub> ][Galacturonate]                                              | 18.3       | n.a.       | n.a.               | n.a.                 | [2]  |
| 2a  | [N <sub>4444</sub> ][Gluconate]                                                  | 0.4        | 120.0      | 161.8              | n.a.                 | [3]  |
| 2b  | [P <sub>4444</sub> ][Gluconate]                                                  | -21.8      | 80.2       | 155.0              | n.a.                 | [3]  |
| 2c  | [P <sub>66614</sub> ][Gluconate]                                                 | 34.0       | n.a.       | 161.8              | n.a.                 | [3]  |
| 2d  | [tmgH][Gluconate]                                                                | -24.1      | n.a.       | 103.1              | 55870 <sup>a</sup>   | [3]  |
| 2e  | [EMIM][Gluconate]                                                                | n.a.       | Liquid     | >250               | n.a.                 | [4]  |
| 3a  | [GlcO(CH <sub>2</sub> ) <sub>2</sub> N <sub>111</sub> ][Arg]                     | -15        | -          | 107                | 247626 <sup>b</sup>  | [5]  |
| 3b  | [GlcO(CH <sub>2</sub> ) <sub>2</sub> N <sub>111</sub> ][Gly]                     | -19        | -          | 198                | 10196 <sup>b</sup>   | [5]  |
| 3c  | [GlcO(CH <sub>2</sub> ) <sub>2</sub> N <sub>111</sub> ][Ser]                     | -18        | -          | 198                | 28645 <sup>b</sup>   | [5]  |
| 3d  | [GlcO(CH <sub>2</sub> ) <sub>2</sub> N <sub>111</sub> ][Hist]                    | -9         | -          | 207                | 106930 <sup>b</sup>  | [5]  |
| 3e  | [GlcO(CH <sub>2</sub> ) <sub>2</sub> N <sub>111</sub> ][Leu]                     | 4          | 28         | 208                | 359841 <sup>b</sup>  | [5]  |
| 3f  | [GlcO(CH <sub>2</sub> ) <sub>2</sub> N <sub>111</sub> ][Trp]                     | 0          | -          | 211                | 408284 <sup>b</sup>  | [5]  |
| 3g  | [GlcO(CH <sub>2</sub> ) <sub>2</sub> N <sub>111</sub> ][Tyr]                     | 6          | -          | 209                | 1476023 <sup>b</sup> | [5]  |
| 3h  | [GlcO(CH <sub>2</sub> ) <sub>2</sub> N <sub>111</sub> ][NTf <sub>2</sub> ]       | -30        | n.a.       | 454.0 <sup>c</sup> | n.a.                 | [6]  |
| 3i  | [GlcO(CH <sub>2</sub> ) <sub>3</sub> N <sub>111</sub> ][NTf <sub>2</sub> ]       | -20        | n.a.       | 456.0 <sup>c</sup> | n.a.                 | [6]  |
| 3j  | [GlcOCH <sub>2</sub> CH(OH)CH <sub>2</sub> N <sub>111</sub> ][NTf <sub>2</sub> ] | -14        | n.a.       | 460.0 <sup>c</sup> | n.a.                 | [6]  |
| 4a  | [GlcO(CH <sub>2</sub> ) <sub>2</sub> N <sub>111</sub> ][Br]                      | n.a.       | n.a.       | n.a.               | n.a.                 | [7]  |
| 4b  | [GlcO(CH <sub>2</sub> ) <sub>2</sub> N <sub>112</sub> ][Br]                      | n.a.       | 90-93      | n.a.               | n.a.                 | [8]  |
| 4c  | [GlcO(CH <sub>2</sub> ) <sub>2</sub> N <sub>116</sub> ][Br]                      | n.a.       | 53-55      | n.a.               | n.a.                 | [8]  |
| 4d  | [GlcO(CH <sub>2</sub> ) <sub>2</sub> N <sub>111</sub> ][MCPA]                    | 12         | Wax        | 235                | n.a.                 | [9]  |
| 4e  | [GlcO(CH <sub>2</sub> ) <sub>2</sub> N <sub>114</sub> ][MCPA]                    | 20         | Liquid     | 285                | n.a.                 | [9]  |
| 4f  | [GlcO(CH <sub>2</sub> ) <sub>2</sub> N <sub>118</sub> ][MCPA]                    | 10         | Wax        | 259                | n.a.                 | [9]  |
| 4g  | [GlcO(CH <sub>2</sub> ) <sub>2</sub> N <sub>112</sub> ][MCPA]                    | 13         | Liquid     | 327                | n.a.                 | [9]  |
| 4h  | [GlcO(CH <sub>2</sub> ) <sub>2</sub> N <sub>116</sub> ][MCPA]                    | 8          | Wax        | 287                | n.a.                 | [9]  |
| 4i  | [GlcO(CH <sub>2</sub> ) <sub>2</sub> N <sub>111</sub> ][2,4-D]                   | 21         | 121        | 251                | n.a.                 | [9]  |
| 4j  | [GlcO(CH <sub>2</sub> ) <sub>2</sub> N <sub>114</sub> ][2,4-D]                   | n.a.       | 134        | 247                | n.a.                 | [9]  |
| 4k  | [GlcO(CH <sub>2</sub> ) <sub>2</sub> N <sub>118</sub> ][2,4-D]                   | 22         | Wax        | 279                | n.a.                 | [9]  |
| 4l  | [GlcO(CH <sub>2</sub> ) <sub>2</sub> N <sub>112</sub> ][2,4-D]                   | 12         | Wax        | 340                | n.a.                 | [9]  |
| 4m  | [GlcO(CH <sub>2</sub> ) <sub>2</sub> N <sub>116</sub> ][2,4-D]                   | 15         | Wax        | 296                | n.a.                 | [9]  |
| 5a  | [Im <sub>3GA4</sub> ][I]                                                         | -3.7       | n.a.       | 197.3              | 5569 <sup>a</sup>    | [3]  |
| 5b  | [N <sub>112GA8</sub> ][NTf <sub>2</sub> ]                                        | -15.9      | n.a.       | 191.1              | 17420 <sup>a</sup>   | [3]  |
| 5c  | [N <sub>112GA8</sub> ][Br]                                                       | -16.6      | n.a.       | 168.4              | 34880 <sup>a</sup>   | [3]  |
| 5d  | [N <sub>113GA8</sub> ][NTf <sub>2</sub> ]                                        | -16.2      | n.a.       | 188.5              | 29030 <sup>a</sup>   | [3]  |
| 5e  | [N <sub>113GA8</sub> ][Br]                                                       | -0.1       | n.a.       | 195.1              | 18120 <sup>a</sup>   | [3]  |
| 5f  | [N <sub>112GA4</sub> ][I]                                                        | -7.9       | n.a.       | 210.3              | 41700 <sup>a</sup>   | [3]  |
| 5g  | [N <sub>112GA4</sub> ][Br]                                                       | -46.6      | n.a.       | 127.8              | 106.3 <sup>a</sup>   | [3]  |
| 5h  | [N <sub>113GA4</sub> ][I]                                                        | -19.4      | n.a.       | 197.7              | 31190 <sup>a</sup>   | [3]  |
| 5i  | [N <sub>112GA8L</sub> ][Br]                                                      | -55.5      | n.a.       | 200.6              | 21980 <sup>a</sup>   | [3]  |
| 5j  | [N <sub>113GA8L</sub> ][Br]                                                      | -36.1      | n.a.       | 200.6              | n.a.                 | [3]  |
| 6a  | [redRibMePyr][OTf]                                                               | -18        | 48-51      | 345                | n.a.                 | [10] |
| 6b  | [redRibOHYPyr][OTf]                                                              | -30        | Liquid     | 297                | n.a.                 | [10] |
| 6c  | [redRibPrPyr][OTf]                                                               | -27        | Liquid     | 235                | n.a.                 | [10] |
| 6d  | [redRibEtPyr][OTf]                                                               | -26        | Liquid     | 316                | n.a.                 | [10] |
| 6e  | [redRibIsoPyr][OMs]                                                              | n.a.       | 92-94      | 296                | n.a.                 | [10] |
| 6f  | [redLyxMePyr][OTf]                                                               | -41        | Liquid     | 325                | n.a.                 | [10] |
| 6g  | [redXylMePyr][OTf]                                                               | -28        | Liquid     | 345                | n.a.                 | [10] |

|     |                                                                           |      |         |                  |      |      |
|-----|---------------------------------------------------------------------------|------|---------|------------------|------|------|
| 6h  | [redAraMePyr][OTf]                                                        | -38  | Liquid  | 340              | n.a. | [10] |
| 7a  | [ $\alpha$ MeGluMePyr][OTf]                                               | n.a. | 95-100  | 242              | n.a. | [10] |
| 7b  | [ $\beta$ MeGluMePyr][OTf]                                                | n.a. | Liquid  | 225              | n.a. | [10] |
| 7c  | [ $\beta$ MeGluMePyr][OMs]                                                | n.a. | 60-63   | 250              | n.a. | [10] |
| 7d  | [ $\beta$ MeGluMePyr][OTs]                                                | n.a. | 135-138 | 242              | n.a. | [10] |
| 7e  | [ $\beta$ AllGluMePyr][OTf]                                               | n.a. | 66-70   | 205              | n.a. | [10] |
| 7f  | [ $\beta$ PhGluMePyr][OTf]                                                | n.a. | 164-168 | 225              | n.a. | [10] |
| 7g  | [ $\beta$ MeGluEtPyr][OTf]                                                | n.a. | 118-120 | 215              | n.a. | [10] |
| 8a  | [N <sub>111</sub> GLU][Br]                                                | n.a. | n.a.    | 277 <sup>c</sup> | n.a. | [1]  |
| 8b  | [N <sub>111</sub> GLU][N(CN) <sub>2</sub> ]                               | n.a. | 124     | 281 <sup>c</sup> | n.a. | [1]  |
| 8c  | [N <sub>111</sub> GLU][NTf <sub>2</sub> ]                                 | n.a. | Liquid  | 429 <sup>c</sup> | n.a. | [1]  |
| 9a  | [GalDABCO][OTf]                                                           | n.a. | n.a.    | 178-182          | n.a. | [11] |
| 9b  | [GalDABCO][I]                                                             | n.a. | n.a.    | 189-192          | n.a. | [11] |
| 9c  | [GalDABCO][BrCH <sub>2</sub> CH <sub>2</sub> SO <sub>3</sub> ]            | n.a. | n.a.    | 198-200          | n.a. | [11] |
| 9d  | [GalDABCO][SbF <sub>6</sub> ]                                             | n.a. | n.a.    | 202-206          | n.a. | [11] |
| 9e  | [GalDABCO][BF <sub>4</sub> ]                                              | n.a. | n.a.    | 222-224          | n.a. | [11] |
| 9f  | [GalDABCO][PF <sub>6</sub> ]                                              | n.a. | n.a.    | 249-252          | n.a. | [11] |
| 10a | [RibMIM][NTf <sub>2</sub> ]                                               | n.a. | Liquid  | n.a.             | n.a. | [12] |
| 10b | [RibMIM][OTs]                                                             | n.a. | Liquid  | n.a.             | n.a. | [12] |
| 10c | [RibMIM][BF <sub>4</sub> ]                                                | n.a. | Liquid  | n.a.             | n.a. | [12] |
| 10d | [RibMIM][PF <sub>6</sub> ]                                                | n.a. | 96-98   | n.a.             | n.a. | [12] |
| 10e | [RibMIM][I]                                                               | n.a. | 124-126 | n.a.             | n.a. | [12] |
| 10f | [RibMIM][Br]                                                              | n.a. | 157-160 | n.a.             | n.a. | [12] |
| 11a | [GalMIM][NTf <sub>2</sub> ]                                               | n.a. | 83-85   | n.a.             | n.a. | [12] |
| 11b | [GalMIM][OTf]                                                             | n.a. | 121-123 | n.a.             | n.a. | [12] |
| 11c | [GalMIM][PF <sub>6</sub> ]                                                | n.a. | 159-161 | n.a.             | n.a. | [12] |
| 11d | [GalMIM][BF <sub>4</sub> ]                                                | n.a. | 177-179 | n.a.             | n.a. | [12] |
| 11e | [GalMIM][I]                                                               | n.a. | 196-198 | n.a.             | n.a. | [13] |
| 12a | [GluNEt <sub>3</sub> ][OTf]                                               | n.a. | 137.5   | 300.0            | n.a. | [14] |
| 12b | [GluSEt <sub>2</sub> ][OTf]                                               | -53  | n.a.    | 210.0            | n.a. | [14] |
| 12c | [GluTHT][OTf]                                                             | n.a. | 110.0   | 250.0            | n.a. | [14] |
| 13a | [GluDABCO <sub>4</sub> ][Br][OTs]                                         | n.a. | 102-107 | n.a.             | n.a. | [15] |
| 13b | [GluDABCO <sub>8</sub> ][Br][OTs]                                         | n.a. | 164-166 | n.a.             | n.a. | [15] |
| 13c | [GluDABCO <sub>14</sub> ][Br][OTs]                                        | n.a. | 129-130 | n.a.             | n.a. | [15] |
| 13d | [GluDABCO <sub>18</sub> ][Br][OTs]                                        | n.a. | 174-176 | n.a.             | n.a. | [15] |
| 14a | [BnOIsoSN <sub>118</sub> ][NTf <sub>2</sub> ]                             | -49  | n.a.    | 180              | n.a. | [16] |
| 14b | [BnOIsoSN <sub>112</sub> ][NTf <sub>2</sub> ]                             | -47  | n.a.    | 180              | n.a. | [16] |
| 14c | [BnOIsoSN <sub>11Bn</sub> ][NTf <sub>2</sub> ]                            | -29  | n.a.    | 200              | n.a. | [16] |
| 14d | [HOIsoSN <sub>118</sub> ][NTf <sub>2</sub> ]                              | -35  | n.a.    | 198              | n.a. | [16] |
| 14e | [BnOIsoSN <sub>118</sub> ][OTf]                                           | -33  | 40      | 195              | n.a. | [16] |
| 14f | [BnOIsoSN <sub>112</sub> ][OTf]                                           | -51  | 45      | 192              | n.a. | [16] |
| 14g | [BnOIsoSN <sub>11Bn</sub> ][OTf]                                          | -15  | 125     | 210              | n.a. | [16] |
| 14h | [HOIsoSN <sub>118</sub> ][OTf]                                            | -15  | 42      | 204              | n.a. | [16] |
| 15a | [N <sub>111</sub> IsoMN <sub>11Bn</sub> ][NTf <sub>2</sub> ] <sub>2</sub> | n.a. | 60      | n.a.             | n.a. | [17] |
| 15b | [N <sub>111</sub> IsoMN <sub>11Bn</sub> ][TFA] <sub>2</sub>               | n.a. | 65      | n.a.             | n.a. | [17] |
| 15c | [N <sub>111</sub> IsoMN <sub>11Bn</sub> ][OTf] <sub>2</sub>               | n.a. | 75      | n.a.             | n.a. | [17] |
| 15d | [N <sub>111</sub> IsoMN <sub>11Bn</sub> ][I] <sub>2</sub>                 | n.a. | 190     | n.a.             | n.a. | [17] |
| 15e | [N <sub>111</sub> IsoMN <sub>11Bn</sub> ][BF <sub>4</sub> ] <sub>2</sub>  | n.a. | 240     | n.a.             | n.a. | [17] |
| 15f | [N <sub>111</sub> IsoMN <sub>11Bn</sub> ][PF <sub>6</sub> ] <sub>2</sub>  | n.a. | 251     | n.a.             | n.a. | [17] |
| 16a | [EtOIsoMN <sub>11Bn</sub> ][NTf <sub>2</sub> ]                            | n.a. | Liquid  | n.a.             | n.a. | [18] |
| 16b | [EtOIsoMN <sub>11Bn</sub> ][TFA]                                          | n.a. | Liquid  | n.a.             | n.a. | [18] |

|     |                                                                                      |      |         |      |      |      |
|-----|--------------------------------------------------------------------------------------|------|---------|------|------|------|
| 16c | [EtOIsoMN <sub>1.1</sub> Bn][OTf]                                                    | n.a. | 80      | n.a. | n.a. | [18] |
| 16d | [EtOIsoMN <sub>1.1</sub> Bn][PF <sub>6</sub> ]                                       | n.a. | 95      | n.a. | n.a. | [18] |
| 16e | [EtOIsoMN <sub>1.1</sub> Bn][BF <sub>4</sub> ]                                       | n.a. | 150     | n.a. | n.a. | [18] |
| 16f | [EtOIsoMN <sub>1.1</sub> Bn][I]                                                      | n.a. | 170     | n.a. | n.a. | [18] |
| 17a | [BimIsoMBim][OTs] <sub>2</sub>                                                       | n.a. | 150-152 | n.a. | n.a. | [19] |
| 17b | [MimIsoMMim][OTs] <sub>2</sub>                                                       | n.a. | Liquid  | n.a. | n.a. | [19] |
| 18a | [DABCOC <sub>3</sub> MannDABCOC <sub>3</sub> ][Br] <sub>2</sub> [OTs] <sub>2</sub>   | n.a. | 100-108 | n.a. | n.a. | [15] |
| 18b | [DABCOC <sub>4</sub> MannDABCOC <sub>4</sub> ][Br] <sub>2</sub> [OTs] <sub>2</sub>   | n.a. | 109-112 | n.a. | n.a. | [15] |
| 18c | [DABCOC <sub>14</sub> MannDABCOC <sub>14</sub> ][Br] <sub>2</sub> [OTs] <sub>2</sub> | n.a. | 135-142 | n.a. | n.a. | [15] |
| 18d | [DABCOC <sub>12</sub> MannDABCOC <sub>12</sub> ][Br] <sub>2</sub> [OTs] <sub>2</sub> | n.a. | 158-168 | n.a. | n.a. | [15] |
| 18e | [DABCOC <sub>18</sub> MannDABCOC <sub>18</sub> ][Br] <sub>2</sub> [OTs] <sub>2</sub> | n.a. | 224-230 | n.a. | n.a. | [15] |

## References

- Brzeczek-Szafran, A.; Erfurt, K.; Blacha-Grzechnik, A.; Krzywiecki, M.; Boncel, S.; Chrobok, A. Carbohydrate Ionic Liquids and Salts as All-in-One Precursors for N-Doped Carbon. *ACS Sustain. Chem. Eng.* **2019**, *7*, 19880–19888.
- Ferlin, N.; Courty, M.; Gatard, S.; Spulak, M.; Quilty, B.; Beadham, I.; Ghavre, M.; Haiß, A.; Kümmerer, K.; Gathergood, N.; et al. Biomass derived ionic liquids: Synthesis from natural organic acids, characterization, toxicity, biodegradation and use as solvents for catalytic hydrogenation processes. *Tetrahedron* **2013**, *69*, 6150–6161.
- Billeci, F.; D’Anna, F.; Feroci, M.; Cancemi, P.; Feo, S.; Forlino, A.; Tonnelli, F.; Seddon, K.R.; Gunaratne, H.Q.N.; Plechkova, N.V. When Functionalization Becomes Useful: Ionic Liquids with a “sweet” Appended Moiety Demonstrate Drastically Reduced Toxicological Effects. *ACS Sustain. Chem. Eng.* **2020**, *8*, 926–938.
- Costa, A.; Forte, A.; Zalewska, K.; Tiago, G.; Petrovski, Z.; Branco, L.C. Novel biocompatible ionic liquids based on gluconate anion. *Green Chem. Lett. Rev.* **2015**, *8*, 8–12.
- Brzeczek-Szafran, A.; Więcek, P.; Guzik, M.; Chrobok, A. Combining amino acids and carbohydrates into readily biodegradable, task specific ionic liquids. *RSC Adv.* **2020**, *10*, 18355–18359.
- Erfurt, K.; Wandzik, I.; Walczak, K.; Matuszek, K.; Chrobok, A. Hydrogen-bond-rich ionic liquids as effective organocatalysts for Diels-Alder reactions. *Green Chem.* **2014**, *16*, 3508–3514.
- Erfurt, K.; Markiewicz, M.; Siewniak, A.; Zalewski, M.; Stolte, S.; Chrobok, A. Biodegradable surface active D-glucose based quaternary ammonium ionic liquids in the solventless synthesis of chloroprene. *ACS Sustain. Chem. Eng.* **2020**.
- Quagliotto, P.; Viscardi, G.; Barolo, C.; Angelo, D.D.; Barni, E.; Compari, C.; Duce, E.; Fiscaro, E. Synthesis and Properties of New Glucocationic Surfactants: Model Structures for Marking Cationic Surfactants with Carbohydrates. **2005**, *70*, 9857–9866.
- Pernak, J.; Czerniak, K.; Biedziak, A.; Marcinkowska, K.; Praczyk, T.; Erfurt, K.; Chrobok, A. Herbicidal ionic liquids derived from renewable sources. *RSC Adv.* **2016**, *6*, 52781–52789.
- Reiß, M.; Brietzke, A.; Eickner, T.; Stein, F.; Villinger, A.; Vogel, C.; Kragl, U.; Jopp, S. Synthesis of novel carbohydrate based pyridinium ionic liquids and cytotoxicity of ionic liquids for mammalian cells. *RSC Adv.* **2020**, *10*, 14299–14304.
- Kaur, N.; Chopra, H.K. Synthesis and applications of carbohydrate based chiral ionic liquids as chiral recognition agents and organocatalysts. *J. Mol. Liq.* **2020**, *298*, 111994.
- Jayachandra, R.; Reddy, S.R. Synthesis of D-ribose and D-galactose Derived Chiral Ionic Liquids as Recyclable Chiral Solvent for Michael Addition Reaction. *Trends Carbohydr. Res.* **2015**, *7*, 60–67.
- Jayachandra, R.; Lakshmiathy, R.; Reddy, S.R. Hydrophobic d-galactose based ionic liquid for the sequestration of Pb<sup>2+</sup> ions from aqueous solution. *J. Mol. Liq.* **2016**, *219*, 1172–1178.
- Poletti, L.; Chiappe, C.; Lay, L.; Pieraccini, D.; Polito, L.; Russo, G. Glucose-derived ionic liquids: Exploring low-cost sources for novel chiral solvents. *Green Chem.* **2007**, *9*, 337–341.
- Thomas, M.; Montenegro, D.; Castaño, A.; Friedman, L.; Leb, J.; Huang, M.L.; Rothman, L.; Lee, H.; Capodiferro, C.; Ambinder, D.; et al. Polycations. 17. Synthesis and properties of polycationic derivatives of carbohydrates. *Carbohydr. Res.* **2009**, *344*, 1620–1627.

16. Van Buu, O.N.; Aupoix, A.; Hong, N.D.T.; Vo-Thanh, G. Chiral ionic liquids derived from isosorbide: Synthesis, properties and applications in asymmetric synthesis. *New J. Chem.* **2009**, *33*, 2060–2072.
17. Kumar, V.; Olsen, C.E.; Schäffer, S.J.C.; Parmar, V.S.; Malhotra, S.V. Synthesis and applications of novel bis(ammonium) chiral ionic liquids derived from isomannide. *Org. Lett.* **2007**, *9*, 3905–3908.
18. Kumar, V.; Pei, C.; Olsen, C.E.; Schäffer, S.J.C.; Parmar, V.S.; Malhotra, S.V. Novel carbohydrate-based chiral ammonium ionic liquids derived from isomannide. *Tetrahedron Asymmetry* **2008**, *19*, 664–671.
19. Gomes Da Silva, M.D.R.; Pereira, M.M.A. New chiral imidazolium ionic liquids from isomannide. *Carbohydr. Res.* **2011**, *346*, 197–202.

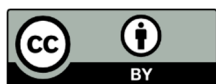

© 2020 by the authors. Licensee MDPI, Basel, Switzerland. This article is an open access article distributed under the terms and conditions of the Creative Commons Attribution (CC BY) license (<http://creativecommons.org/licenses/by/4.0/>).
